# Supplementary material for: Determination of ADH in textiles using the HPLC-MS/MS method and the study of its adsorption behaviour towards formaldehyde
Source: Royal Society of Chemistry journal article supplement (doi:10.1039/c7ra13155k), 2018-01-01
Supplement: c7ra13155k1.pdf [file c7ra13155k1.pdf]

## Supplementary information

### Determination of ADH in textiles using HPLC-MS/MS method and the study of its adsorption behaviour towards formaldehyde

Jinxiong Tao,<sup>\*,a</sup> Ziwei Lin,<sup>a</sup> Haixuan Zhang,<sup>a</sup> Zhuoming Wu<sup>a</sup> and Haihui Cao<sup>b</sup>

<sup>a</sup> Shenzhen Academy of Metrology and Quality Inspection, Shenzhen 518000, P. R. China

<sup>b</sup> Embry (China) Garments Co. Ltd, Shenzhen, Guangdong, 518000, P. R. China.

\*Corresponding author: E-mail: taojinxiong@yeah.net; Tel: +86-0755-27528470

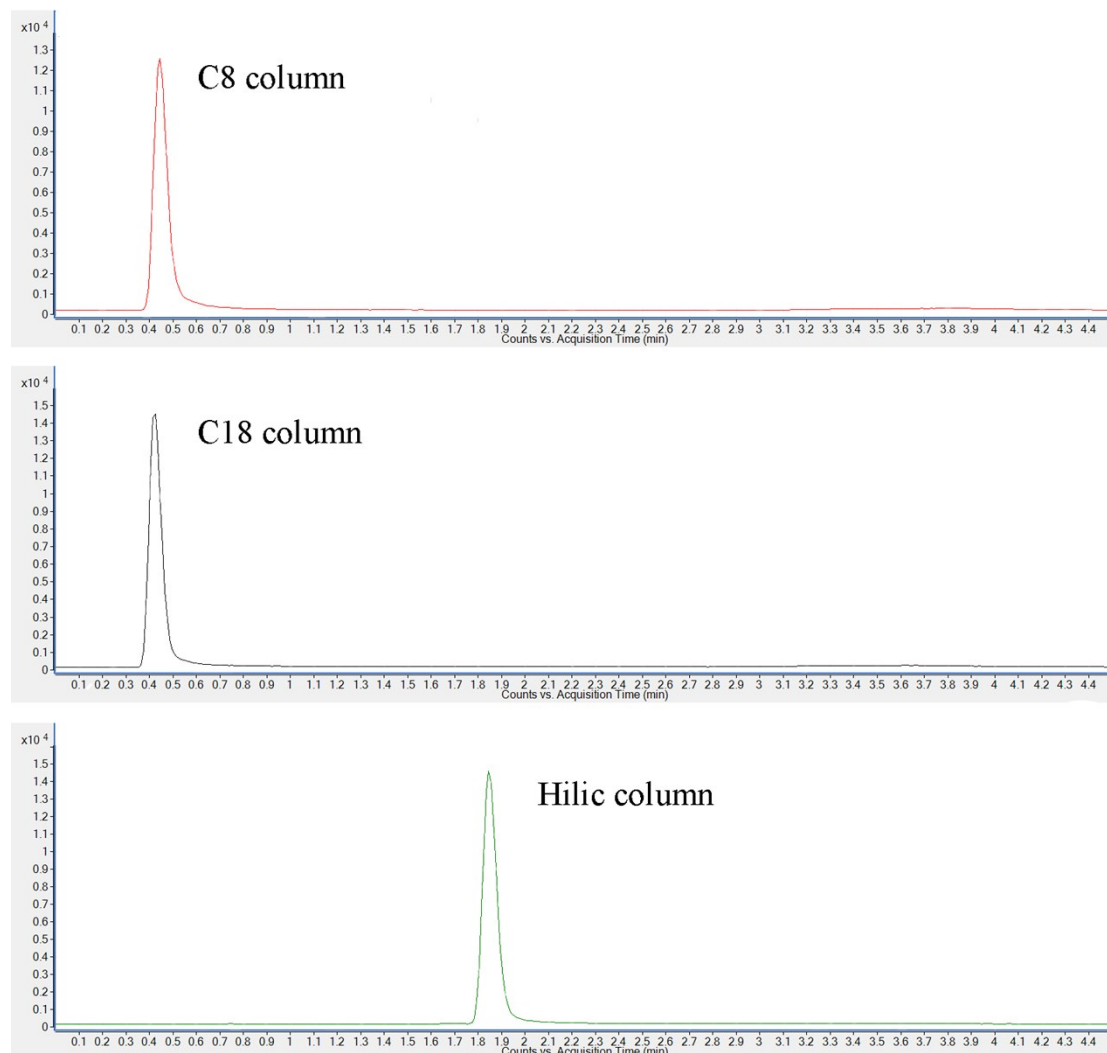

**Fig. S1** The separation effect of different columns

**Table S1** Determination value of ADH in textiles under different extracting modes

| sample | extracting mode         | testing results, mg kg <sup>-1</sup> |                   |         |
|--------|-------------------------|--------------------------------------|-------------------|---------|
|        |                         | parallel sample 1                    | parallel sample 2 | average |
| A      | shaking bath extraction | 15                                   | 15                | 15      |
|        | ultrasonic extraction   | 16                                   | 16                | 16      |
| B      | shaking bath extraction | 417                                  | 413               | 415     |
|        | ultrasonic extraction   | 444                                  | 441               | 442     |
| C      | shaking bath extraction | 650                                  | 644               | 647     |
|        | ultrasonic extraction   | 669                                  | 681               | 675     |

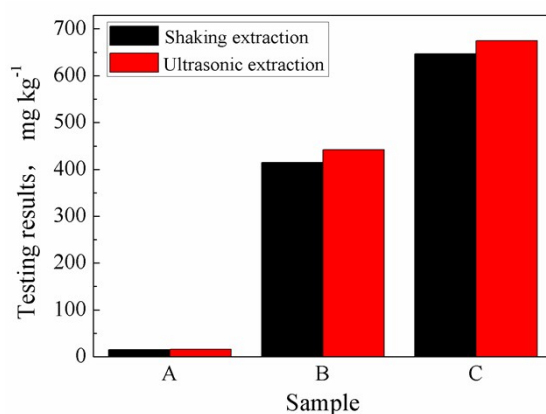**Fig. S2** Comparison of the extraction efficiencies on ADH in textiles under different extracting modes**Table S2** Recovery rate and RSD values of ADH determination in real samples

| Items                               | Testing results |       |       |
|-------------------------------------|-----------------|-------|-------|
| Added (mg L <sup>-1</sup> )         | 0.20            | 0.50  | 1.00  |
| Found (mg L <sup>-1</sup> )         | 0.20            | 0.43  | 0.86  |
|                                     | 0.19            | 0.44  | 0.85  |
|                                     | 0.19            | 0.44  | 0.86  |
|                                     | 0.19            | 0.43  | 0.87  |
|                                     | 0.19            | 0.44  | 0.87  |
|                                     | 0.19            | 0.44  | 0.87  |
|                                     | 0.20            | 0.44  | 0.88  |
|                                     | 0.20            | 0.44  | 0.89  |
|                                     | 0.19            | 0.44  | 0.87  |
| Average value/(mg L <sup>-1</sup> ) | 0.19            | 0.44  | 0.87  |
| Recovery (%)                        | 95              | 88    | 87    |
| SD (mg L <sup>-1</sup> )            | 0.005           | 0.021 | 0.045 |
| RSD (%)                             | 2.7             | 4.8   | 5.2   |

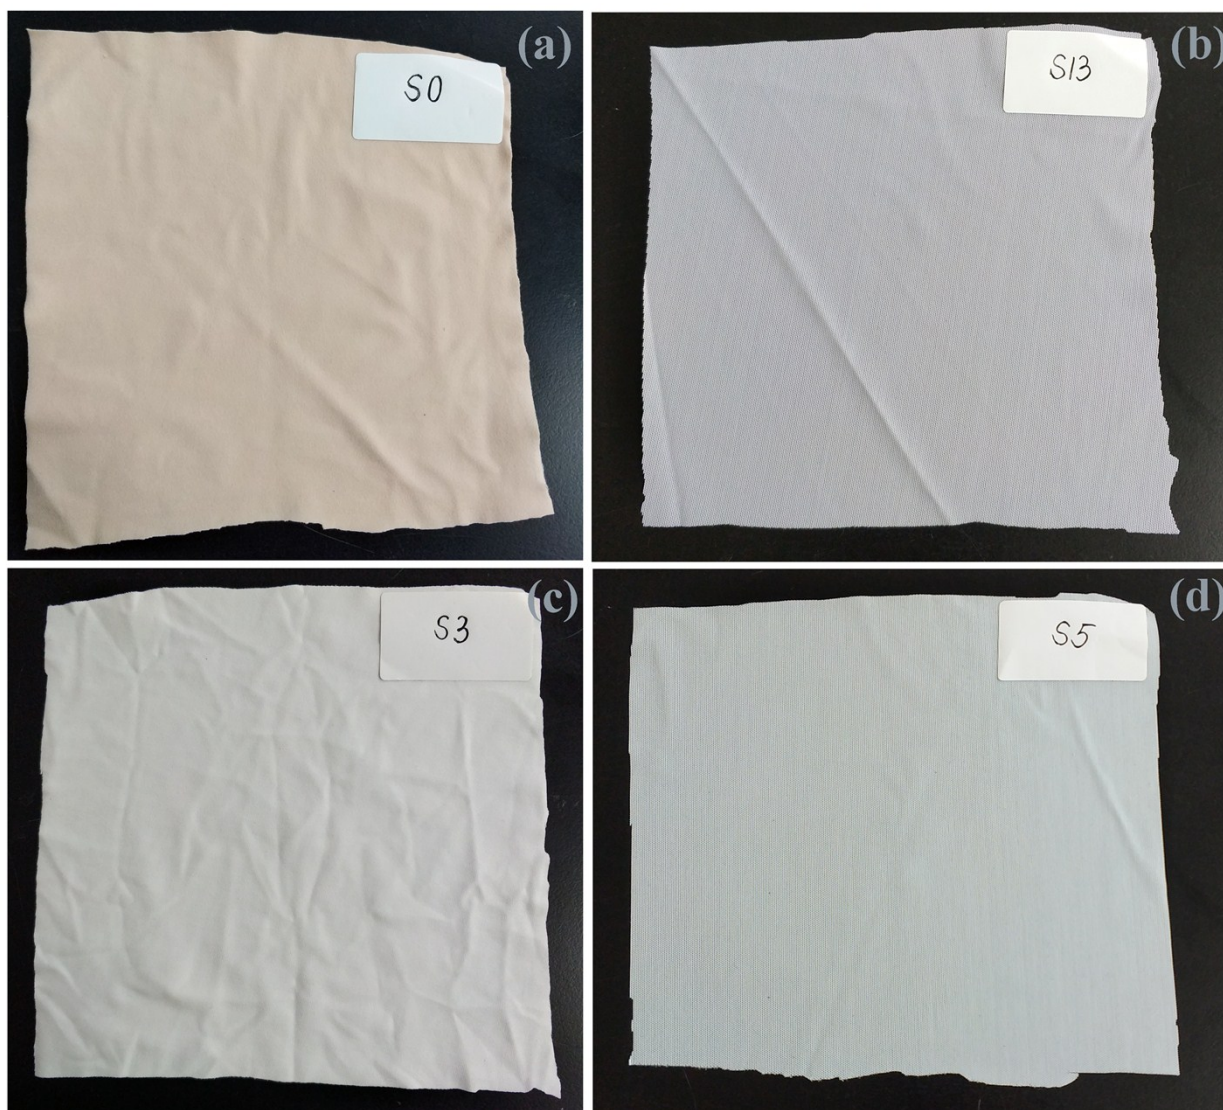

**Fig. S3** Photographs of samples S0, S3, S5 and S11

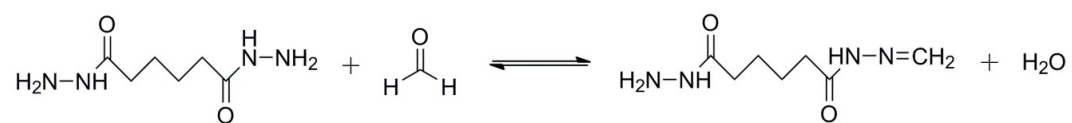

**Fig. S4** Reaction mechanism of ADH and formaldehyde in the balance of adsorption and desorption.
